# Supplementary material
Source: HighWire-hosted journal article supplement (http://www.jrheum.org/highwire/filestream/34967/field_highwire_adjunct_files/0/181043DataSuppl.pdf)
Supplement: 181043DataSuppl.pdf [file 181043DataSuppl.pdf]

**ONLINE SUPPLEMENTARY DATA**

**Supplementary Table 1:** Baseline characteristics (STIHO cohort, n=90).

| <b>VARIABLE</b>                      |                   |
|--------------------------------------|-------------------|
| Age (mean(SD))                       | 59 (12.9) years   |
| Symptom duration (mean(SD))          | 4.4 (4.5) years   |
| Sex male:female                      | 50 (55%):40 (45%) |
| Radiographic Kellgren-Lawrence grade |                   |
| 0                                    | 0 (0%)            |
| 1                                    | 18 (20%)          |
| 2                                    | 25 (27.8%)        |
| 3                                    | 31 (34.4%)        |
| 4                                    | 16 (17.8%)        |
| Hip injected with steroid            |                   |
| Unilateral (N(%))                    | 88 (97.8%)        |
| Bilateral (N(%))                     | 2 (2.2%)          |
| Current medication <i>n</i> (%)      |                   |
| Acetaminophen                        | 19 (21%)          |
| Opiate                               | 2 (2.2%)          |
| Tramadol                             | 5 (5.6%)          |
| NSAID                                | 22 (24.4%)        |

**Supplementary Table 2:** Self-reported pain, stiffness and functional disability by WOMAC index in STIHO cohort (n=90).

|                                          |             |
|------------------------------------------|-------------|
| <b>WOMAC pain (0–100) mean (SD)</b>      |             |
| Baseline                                 | 45.2 (20.1) |
| 8 weeks post injection                   | 38.6 (22.3) |
| <b>WOMAC function (0–100) mean (SD)</b>  |             |
| Baseline                                 | 42.3 (17.3) |
| 8 weeks post injection                   | 36.8 (20.8) |
| <b>WOMAC stiffness (0–100) mean (SD)</b> |             |
| Baseline                                 | 55.5 (23.1) |
| 8 weeks post injection                   | 43.9 (24.3) |
| <b>WOMAC total (0–100) mean (SD)</b>     |             |
| Baseline                                 | 44.0 (17.4) |
| 8 weeks post injection                   | 37.7 (20.8) |
